# Supplementary material for: Identification and Construction of a Long Noncoding RNA Prognostic Risk Model for Stomach Adenocarcinoma Patients
Source: PubMed Central journal article supplement (PMC7929674; doi:10.1155/2021/8895723), 2021-02-24

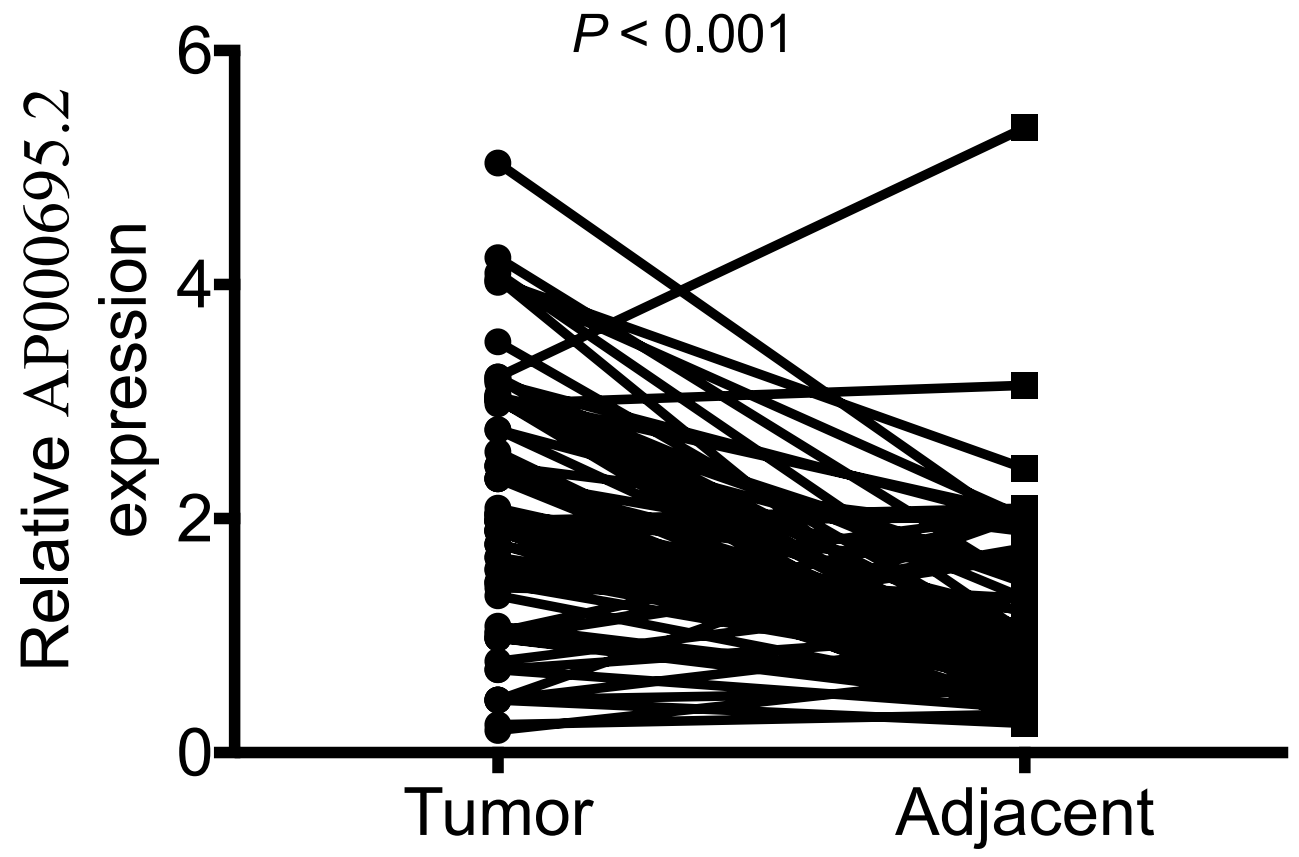

Supplement: 8895723.f1.pdf [file 8895723.f1.pdf]
